# Supplementary material for: Distribution and habitat segregation on different spatial scales among diploid, tetraploid and hexaploid cytotypes of Senecio carniolicus (Asteraceae) in the Eastern Alps
Source: PubMed Central journal article supplement — Ann Bot. 2010 Sep 29;106(6):967–77. doi: 10.1093/aob/mcq192 (PMC2990664; doi:10.1093/aob/mcq192), 2010-09-29

## SUPPLEMENTARY DATA

TABLE S1. Relative fluorescence intensities of DAPI-stained nuclei (with *Pisum sativum* ‘Ctirad’ used as internal reference standard for FCM) of 5033 silica gel-dried leaf samples of *Senecio carniolicus* from 100 sample localities. Numbers of individuals upon which the presented mean values are based are given in the Appendix in the main text.

| Code | Locality (Country)              | Relative fluorescence intensity (mean $\pm$ s.d.) |       |                   |                   |                   |                   |    |       |
|------|---------------------------------|---------------------------------------------------|-------|-------------------|-------------------|-------------------|-------------------|----|-------|
|      |                                 | 2x                                                | 3x    | 4x                | 5x                | 6x                | 7x                | 8x | 9x    |
| 1    | Cima dell Uomo (CH)             | 0.837 $\pm$ 0.004                                 |       |                   |                   |                   |                   |    |       |
| 2    | Pizzo di Gino (IT)              | 0.817 $\pm$ 0.010                                 |       |                   |                   |                   |                   |    |       |
| 3    | Campanile di Val Marina (IT)    | 0.833 $\pm$ 0.009                                 |       |                   |                   |                   |                   |    |       |
| 4    | Monte Legnone (IT)              | 0.813 $\pm$ 0.013                                 |       |                   |                   |                   |                   |    |       |
| 5    | Passo Locino (IT)               | 0.825 $\pm$ 0.014                                 |       |                   |                   | 2.230 $\pm$ 0.028 |                   |    |       |
| 6    | Monte Verrobbio (IT)            | 0.820 $\pm$ 0.007                                 | 1.219 |                   |                   |                   |                   |    |       |
| 7    | Cima Cadelle (IT)               |                                                   |       |                   |                   | 2.200 $\pm$ 0.033 |                   |    |       |
| 8    | Laghi Gemelli (IT)              |                                                   |       |                   |                   | 2.178 $\pm$ 0.056 |                   |    |       |
| 9    | Pizzo di Coca (IT)              |                                                   |       | 1.502 $\pm$ 0.019 |                   | 2.273             |                   |    |       |
| 10   | Monte Colombine (IT)            | 0.802 $\pm$ 0.018                                 |       |                   |                   | 2.211 $\pm$ 0.050 |                   |    |       |
| 11   | Bocchetta Vicima (IT)           |                                                   |       |                   |                   | 2.242 $\pm$ 0.018 |                   |    |       |
| 12   | Bocchetta della Forbici (IT)    |                                                   |       |                   |                   | 2.238 $\pm$ 0.017 |                   |    |       |
| 13   | Diavolezza, Munt Pers (CH)      |                                                   |       |                   |                   | 2.216 $\pm$ 0.035 |                   |    |       |
| 14   | Monte Vago (IT)                 |                                                   |       |                   |                   | 2.255 $\pm$ 0.025 |                   |    | 3.307 |
| 15   | Piz Nair (CH)                   |                                                   |       |                   |                   | 2.211 $\pm$ 0.026 |                   |    |       |
| 16   | Sandhubel (CH)                  |                                                   |       |                   |                   | 2.221 $\pm$ 0.044 |                   |    |       |
| 17   | Flüela Schwarzhorn (CH)         |                                                   |       |                   |                   | 2.216 $\pm$ 0.031 |                   |    |       |
| 18   | Hohes Rad (AT)                  |                                                   |       |                   |                   | 2.191 $\pm$ 0.025 |                   |    |       |
| 19   | Arlensattel (AT)                |                                                   |       |                   |                   | 2.211 $\pm$ 0.028 |                   |    |       |
| 20   | Monte Verva (IT)                |                                                   |       | 1.491 $\pm$ 0.010 | 1.813 $\pm$ 0.060 | 2.194 $\pm$ 0.045 |                   |    |       |
| 21   | Monte di Gavia (IT)             |                                                   |       | 1.486 $\pm$ 0.023 | 1.840             |                   |                   |    |       |
| 22   | Monte Serodine (IT)             |                                                   |       | 1.521 $\pm$ 0.014 |                   |                   |                   |    |       |
| 23   | Cresta del Belvedere (IT)       | 0.820 $\pm$ 0.007                                 |       | 1.497 $\pm$ 0.024 |                   |                   |                   |    |       |
| 24   | Cima Valletta (IT)              | 0.809                                             |       | 1.498 $\pm$ 0.023 | 1.899 $\pm$ 0.035 |                   |                   |    |       |
| 25   | Cima Cavaion (IT)               |                                                   |       | 1.499 $\pm$ 0.021 | 1.824             |                   |                   |    |       |
| 26   | Stilfser Joch (IT)              |                                                   |       | 1.469 $\pm$ 0.029 |                   | 2.154 $\pm$ 0.049 |                   |    |       |
| 27   | Laaser Spitze (IT)              |                                                   |       |                   |                   | 2.236 $\pm$ 0.016 |                   |    |       |
| 28   | Watles (IT)                     |                                                   |       |                   |                   | 2.215 $\pm$ 0.038 |                   |    |       |
| 29   | Steinmandlköpfl, Mittereck (IT) |                                                   |       |                   |                   | 2.217 $\pm$ 0.024 |                   |    |       |
| 30   | Piz Lad (IT)                    |                                                   |       |                   |                   | 2.216 $\pm$ 0.031 | 2.494             |    | 3.338 |
| 31   | Fisser Joch, Brunnenkopf (AT)   |                                                   |       |                   |                   | 2.224 $\pm$ 0.023 | 2.421             |    |       |
| 32   | Hohe Aifnerspitze (AT)          |                                                   |       |                   |                   | 2.162 $\pm$ 0.039 |                   |    |       |
| 33   | Riffeljoch (AT)                 |                                                   |       |                   |                   | 2.158 $\pm$ 0.042 |                   |    |       |
| 34   | Gaislachkogel (AT)              |                                                   |       |                   |                   | 2.152 $\pm$ 0.026 |                   |    | 3.311 |
| 35   | Schröfwand (IT)                 | 0.819 $\pm$ 0.003                                 |       |                   |                   | 2.224 $\pm$ 0.020 |                   |    |       |
| 36   | Festkogel (AT)                  | 0.788 $\pm$ 0.012                                 |       |                   |                   | 2.162 $\pm$ 0.046 |                   |    |       |
| 37   | Vermoispitze (IT)               |                                                   |       |                   |                   | 2.239 $\pm$ 0.051 |                   |    |       |
| 38   | Naturser Hochwart (IT)          | 0.805 $\pm$ 0.011                                 |       |                   |                   | 2.220 $\pm$ 0.029 | 2.780 $\pm$ 0.056 |    | 3.353 |
| 39   | Monte Ziolera (IT)              | 0.802 $\pm$ 0.016                                 |       |                   |                   | 2.220 $\pm$ 0.037 |                   |    |       |
| 40   | Cima D'Asta (IT)                | 0.814                                             |       | 1.535 $\pm$ 0.022 | 1.844 $\pm$ 0.058 | 2.197 $\pm$ 0.038 |                   |    |       |
| 41   | Cavallazza Piccola (IT)         | 0.811 $\pm$ 0.008                                 |       |                   |                   | 2.238 $\pm$ 0.035 |                   |    |       |
| 42   | Col Margherita (IT)             |                                                   |       |                   |                   | 2.210 $\pm$ 0.034 |                   |    |       |
| 43   | Pre de Ciapel (IT)              | 0.807 $\pm$ 0.010                                 |       |                   |                   | 2.208 $\pm$ 0.034 | 2.483             |    |       |
| 44   | Sarner Scharte (IT)             | 0.803 $\pm$ 0.012                                 |       |                   |                   |                   |                   |    |       |
| 45   | Schrotthorn (IT)                | 0.791 $\pm$ 0.023                                 |       |                   |                   | 2.192 $\pm$ 0.050 |                   |    |       |

|     |                                  |               |               |               |       |               |       |
|-----|----------------------------------|---------------|---------------|---------------|-------|---------------|-------|
| 46  | Plose (IT)                       | 0.810 ± 0.012 |               |               |       | 2.229 ± 0.028 |       |
| 47  | Schrankogel (AT)                 | 0.796 ± 0.013 |               |               |       | 2.168 ± 0.042 |       |
| 48  | Rietzer Griebkogel (AT)          | 0.798 ± 0.007 |               |               |       | 2.197 ± 0.035 |       |
| 49  | Habicht (AT)                     | 0.783 ± 0.010 | 1.172         |               |       |               |       |
| 50  | Nöblachjoch, Eggersteller (AT)   | 0.789 ± 0.010 |               |               |       |               |       |
| 51  | Patscherkofel, Viggarspitze (AT) |               |               |               |       | 2.189 ± 0.035 |       |
| 52  | Saurüssel (AT)                   | 0.788 ± 0.006 |               |               |       |               |       |
| 53  | Rauchkofel (IT)                  | 0.796 ± 0.014 |               |               |       |               |       |
| 54  | Speikboden (IT)                  | 0.805 ± 0.009 |               |               |       |               |       |
| 55  | Sambock (IT)                     | 0.792 ± 0.025 |               |               |       | 2.199 ± 0.038 | 3.252 |
| 56  | Kronplatz (IT)                   |               |               |               |       | 2.207 ± 0.033 |       |
| 57  | Antholzer Scharte (IT)           | 0.805 ± 0.013 |               |               |       |               |       |
| 58  | Almerhorn (AT)                   | 0.812 ± 0.012 |               |               |       | 2.172 ± 0.029 |       |
| 59  | Riepenspitz (IT)                 | 0.812 ± 0.029 |               |               |       | 2.159 ± 0.021 |       |
| 60  | Toblacher Pfannhorn (IT)         | 0.816 ± 0.007 |               |               |       | 2.165 ± 0.024 |       |
| 61  | Donnerstein (AT)                 |               |               |               |       | 2.142 ± 0.019 |       |
| 62  | Gölbner (AT)                     | 0.810 ± 0.006 |               |               |       | 2.145 ± 0.016 |       |
| 63  | Col Quaternà (IT)                | 0.810 ± 0.012 |               |               |       | 2.162 ± 0.031 |       |
| 64  | Monte Peralba (IT)               |               |               |               |       | 2.095 ± 0.050 |       |
| 65  | Monte Crostis (IT)               |               |               |               |       | 2.117 ± 0.038 |       |
| 66  | Schleinitz (AT)                  | 0.769 ± 0.004 |               |               |       | 2.154 ± 0.026 |       |
| 67  | Kaiser Höhe (AT)                 |               |               |               |       | 2.125 ± 0.036 |       |
| 68  | Schönleitenspitze (AT)           | 0.741 ± 0.007 |               |               |       | 2.032 ± 0.047 |       |
| 69  | Kapruner Törl (AT)               | 0.754 ± 0.001 |               |               |       |               |       |
| 70  | Sadnig (AT)                      | 0.760 ± 0.009 |               |               |       | 2.130 ± 0.028 |       |
| 71  | Scharnik (AT)                    | 0.742 ± 0.014 |               |               |       | 2.138 ± 0.021 |       |
| 72  | Polinik (AT)                     | 0.726 ± 0.019 |               |               |       | 2.066 ± 0.057 |       |
| 73  | Dolzer, Gaugen (AT)              |               |               |               |       | 2.070 ± 0.029 |       |
| 74  | Gmeineck (AT)                    | 0.750 ± 0.015 |               |               |       | 2.084 ± 0.022 |       |
| 75  | Reißbeck (AT)                    | 0.755 ± 0.013 |               |               |       | 2.088 ± 0.008 |       |
| 76  | Ankogel (AT)                     | 0.760 ± 0.007 | 1.110         |               |       |               |       |
| 77  | Großer Hafner (AT)               | 0.758 ± 0.020 |               |               |       | 2.163 ± 0.020 |       |
| 78  | Belščica (AT / SLO)              | 0.778 ± 0.011 |               |               |       |               |       |
| 79  | Rosennock (AT)                   | 0.762 ± 0.014 | 1.468         | 1.799         |       | 2.116 ± 0.033 |       |
| 80  | Bretthöhe (AT)                   | 0.754 ± 0.011 | 1.472 ± 0.035 |               |       | 2.134 ± 0.043 | 2.590 |
| 81  | Wandspitze (AT)                  |               | 1.479 ± 0.033 | 1.787 ± 0.049 |       | 2.127 ± 0.074 |       |
| 82  | Balonspitze (AT)                 | 0.740 ± 0.008 |               |               |       | 2.058 ± 0.018 |       |
| 83  | Seekarspitze (AT)                |               | 1.427 ± 0.019 |               |       |               |       |
| 84  | Zechnerkarspitze (AT)            |               | 1.431 ± 0.010 | 1.767 ± 0.014 |       | 2.046 ± 0.043 |       |
| 85  | Trockenbrotscharte (AT)          |               | 1.440 ± 0.026 | 1.804 ± 0.059 |       |               |       |
| 86  | Preber (AT)                      | 0.746 ± 0.012 | 1.429 ± 0.016 |               |       | 2.046 ± 0.018 |       |
| 87  | Predigstuhl (AT)                 | 0.752 ± 0.018 | 1.434 ± 0.013 |               |       | 2.068 ± 0.034 |       |
| 88  | Deneck (AT)                      |               | 1.447 ± 0.028 |               |       |               |       |
| 89  | Großer Knallstein (AT)           | 0.728 ± 0.015 | 1.431 ± 0.014 |               |       |               |       |
| 90  | Hochrettelstein (AT)             |               | 1.487 ± 0.041 |               |       |               |       |
| 91  | Hohenwart (AT)                   |               | 1.453 ± 0.011 |               |       |               |       |
| 92  | Schießbeck (AT)                  | 0.765 ± 0.011 | 1.138 ± 0.016 | 1.458 ± 0.019 | 1.797 | 2.121 ± 0.054 |       |
| 93  | Großer Bösenstein (AT)           |               | 1.455 ± 0.018 | 1.790 ± 0.015 |       |               |       |
| 94  | Gamskogel (AT)                   |               | 1.449 ± 0.025 | 1.779 ± 0.036 |       |               |       |
| 95  | Großer Ringkogel (AT)            | 0.759 ± 0.009 |               | 1.770 ± 0.010 |       | 2.143 ± 0.034 |       |
| 96  | Seckauer Zinken (AT)             | 0.758 ± 0.009 | 1.434 ± 0.025 | 1.790 ± 0.021 |       | 2.104 ± 0.054 |       |
| 97  | Zirbitzkogel (AT)                | 0.759         | 1.460 ± 0.013 |               |       | 2.130 ± 0.017 |       |
| 98  | Sauualpe (AT)                    |               |               |               |       | 2.124 ± 0.032 |       |
| 99  | Ameringkogel (AT)                |               |               |               |       | 2.139 ± 0.038 |       |
| 100 | Roßbachkogel (AT)                |               |               |               |       | 2.077 ± 0.015 |       |

TABLE S2. Mean relative fluorescence intensities (per monoploid genome) of individual ploidy levels of *Senecio carniolicus* (relative to *Pisum sativum* ‘Ctirad’) in the present study and in our previous work (Suda *et al.*, 2007). Note the stability of fluorescence values in polyploids, indicating the absence of genome downsizing.

| DNA ploidy level | Mean fluorescence per monoploid genome (Suda et al. 2007) | Mean fluorescence per monoploid genome (present study) |
|------------------|-----------------------------------------------------------|--------------------------------------------------------|
| 2x               | 0.395                                                     | 0.393                                                  |
| 3x               | –                                                         | 0.387                                                  |
| 4x               | 0.375                                                     | 0.367                                                  |
| 5x               | 0.367                                                     | 0.361                                                  |
| 6x               | 0.359                                                     | 0.359                                                  |
| 7x               | 0.360                                                     | 0.357                                                  |
| 8x               | –                                                         | 0.348                                                  |
| 9x               | –                                                         | 0.368                                                  |

FIG. S1. The spatial distribution of individuals of *Senecio carniolicus* within selected mixed populations illustrates that cytotypes can be largely separated from each other with only a small contact zone (population 20) as well as strongly intermingled (population 86). These patterns did not obviously depend on the combination of cytotypes occurring in a particular population. Diploid, tetraploid and hexaploid individuals are given as yellow, red and blue dots, respectively. Numbers refer to the population number in the Appendix in the main text.

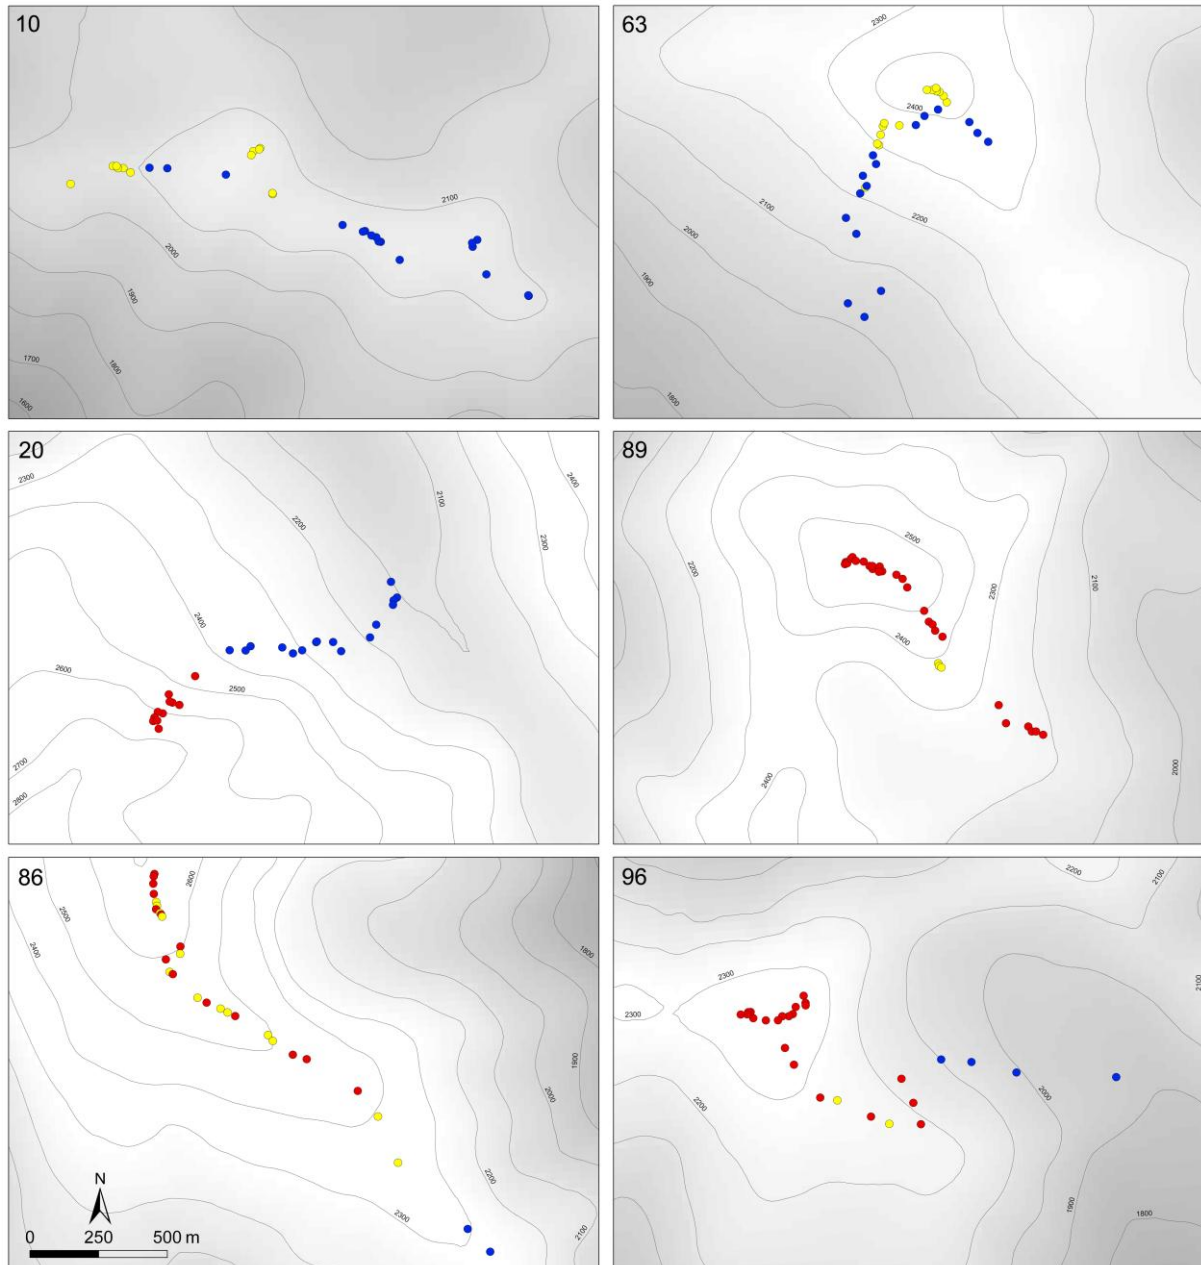

FIG. S2. Mean relative fluorescence intensities of DNA-diploid, DNA-triploid, DNA-tetraploid, DNA-pentaploid and DNA-hexaploid samples of *Senecio carniolicus* (using *Pisum sativum* 'Ctirad',  $2C = 9.09$  pg as a unit value). Note the marked discontinuity in fluorescence values resulting in distinct separation of putative triploid and pentaploid plants.

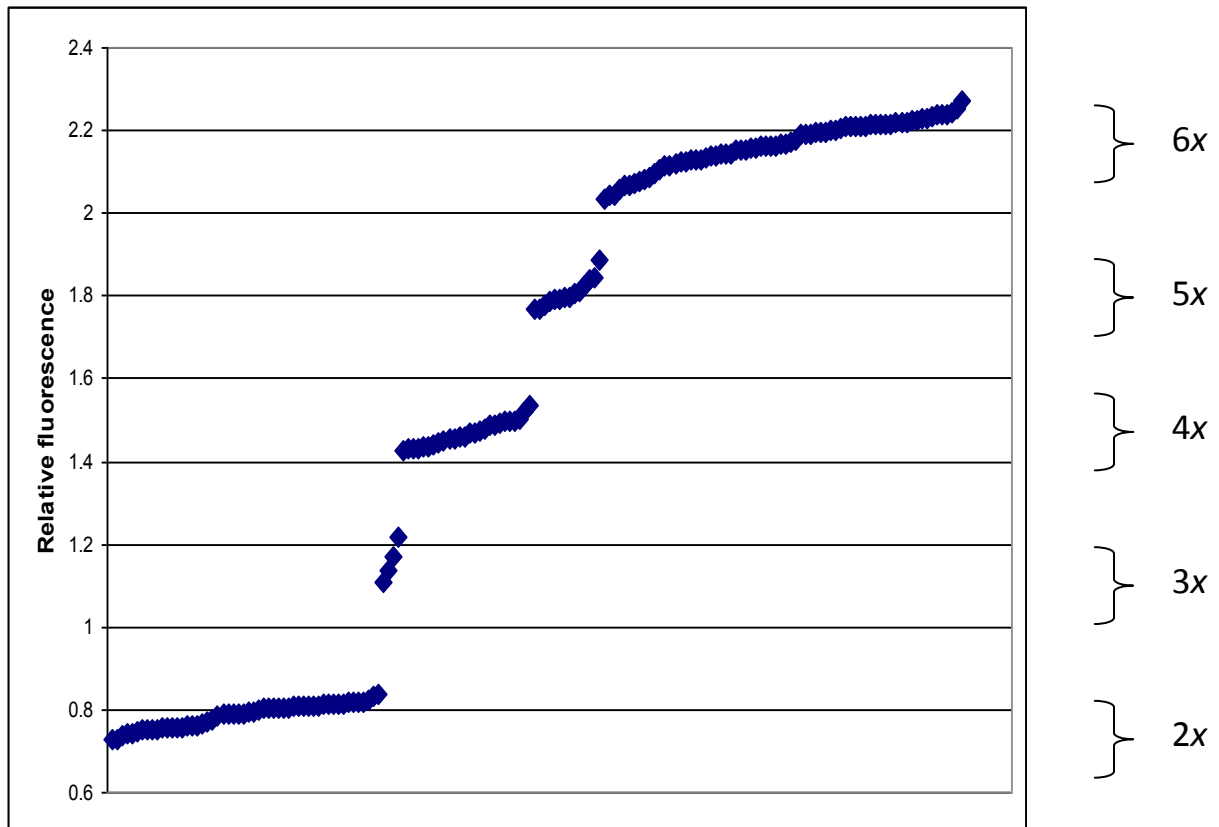

FIG. S3. Mean relative fluorescence intensities of DNA-hexaploid, DNA-heptaploid, DNA-octaploid and DNA-enneaploid samples of *Senecio carniolicus* (using *Pisum sativum* 'Ctirad', 2C = 9.09 pg as a unit value). Note the marked discontinuity in fluorescence values between different DNA ploidy levels.

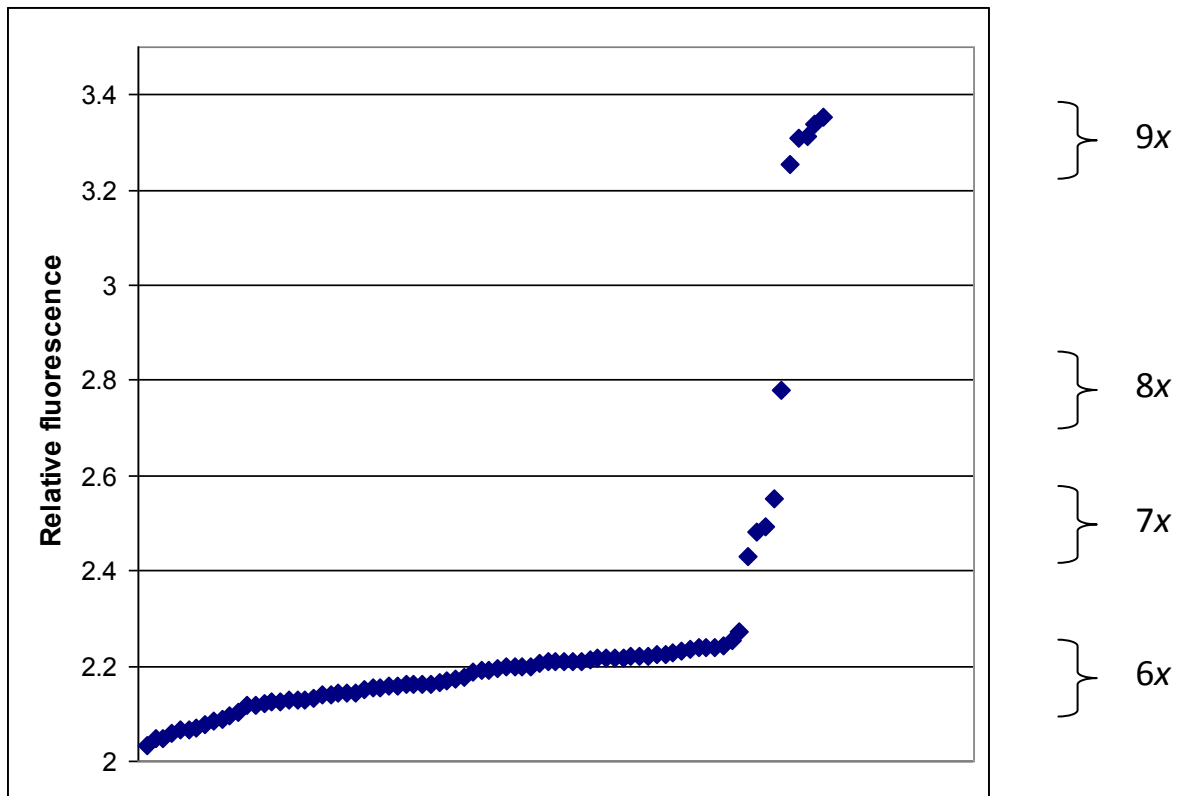

Supplement: supp_mcq192_mcq192supp.pdf [file supp_mcq192_mcq192supp.pdf]
